# Supplementary material for: Reshuffling yeast chromosomes with CRISPR/Cas9
Source: PubMed Central journal article supplement (PMC6738639; doi:10.1371/journal.pgen.1008332), 2019-08-29
Supplement: pgen.1008332.s001.pdf [file pgen.1008332.s001.pdf]

V 5' ATTGCGCTCTTTCCCGACGAGAGTAAATGGCGAGGATACGTTCTCTATGGAGGATGGCATAGGTGATGAAGATGAAGGAGAAGTACAGAACGCTGAAGTGAA  
 |||  
 Vt XV 5' ATTGCGCTCTTTCCCGACGAGAGTAAATGGCGAGGATACGTTCTCTATGGATGTAGGAACATCAACATGCTCAATCTCAATCGTTAGCACATCACATTTTTC  
 |||  
 XV 5' TGGAGAAGGGTAAATTTTTAATTTGGGATGTTTTACTTGAAGATTCITTAGTGTAGGAACATCAACATGCTCAATCTCAATCGTTAGCACATCACATTTTTC  
 |||

XV 5' TGGAGAAGGGTAAATTTTTAATTTGGGATGTTTTACTTGAAGATTCITTAGTGTAGGAACATCAACATGCTCAATCTCAATCGTTAGCACATCACATTTTTC  
 |||  
 XVt V 5' TGGAGAAGGGTAAATTTTTAATTTGGGATGTTTTACTTGAAGATTCITTAGGGATGGCATAGGTGATGAAGATGAAGGAGAAGTACAGAACGCTGAAGTGAA  
 |||  
 V 5' ATTGCGCTCTTTCCCGACGAGAGTAAATGGCGAGGATACGTTCTCTATGGAGGATGGCATAGGTGATGAAGATGAAGGAGAAGTACAGAACGCTGAAGTGAA  
 |||

V 5' ATTGCGCTCTTTCCCGACGAGAGTAAATGGCGAGGATACGTTCTCTATGGAGGATGGCATAGGTGATGAAGATGAAGGAGAAGTACAGAACGCTGAAGTGAA  
 |||  
 restored V 5' ATTGCGCTCTTTCCCGACGAGAGTAAATGGCGAGGATACGTTCTCTATGGAGGATGGCATAGGTGATGAAGATGAAGGAGAAGTACAGAACGCTGAAGTGAA  
 |||

XV 5' TGGAGAAGGGTAAATTTTTAATTTGGGATGTTTTACTTGAAGATTCITTAGTGTAGGAACATCAACATGCTCAATCTCAATCGTTAGCACATCACATTTTTC  
 |||  
 restored XV 5' TGGAGAAGGGTAAATTTTTAATTTGGGATGTTTTACTTGAAGATTCITTAGTGTAGGAACATCAACATGCTCAATCTCAATCGTTAGCACATCACATTTTTC  
 |||

## Supplementary figure 1
