# Supplementary material for: Reshuffling yeast chromosomes with CRISPR/Cas9
Source: PubMed Central journal article supplement (PMC6738639; doi:10.1371/journal.pgen.1008332), 2019-08-29
Supplement: pgen.1008332.s007.pdf [file pgen.1008332.s007.pdf]

Ratio to BY4741

All strains

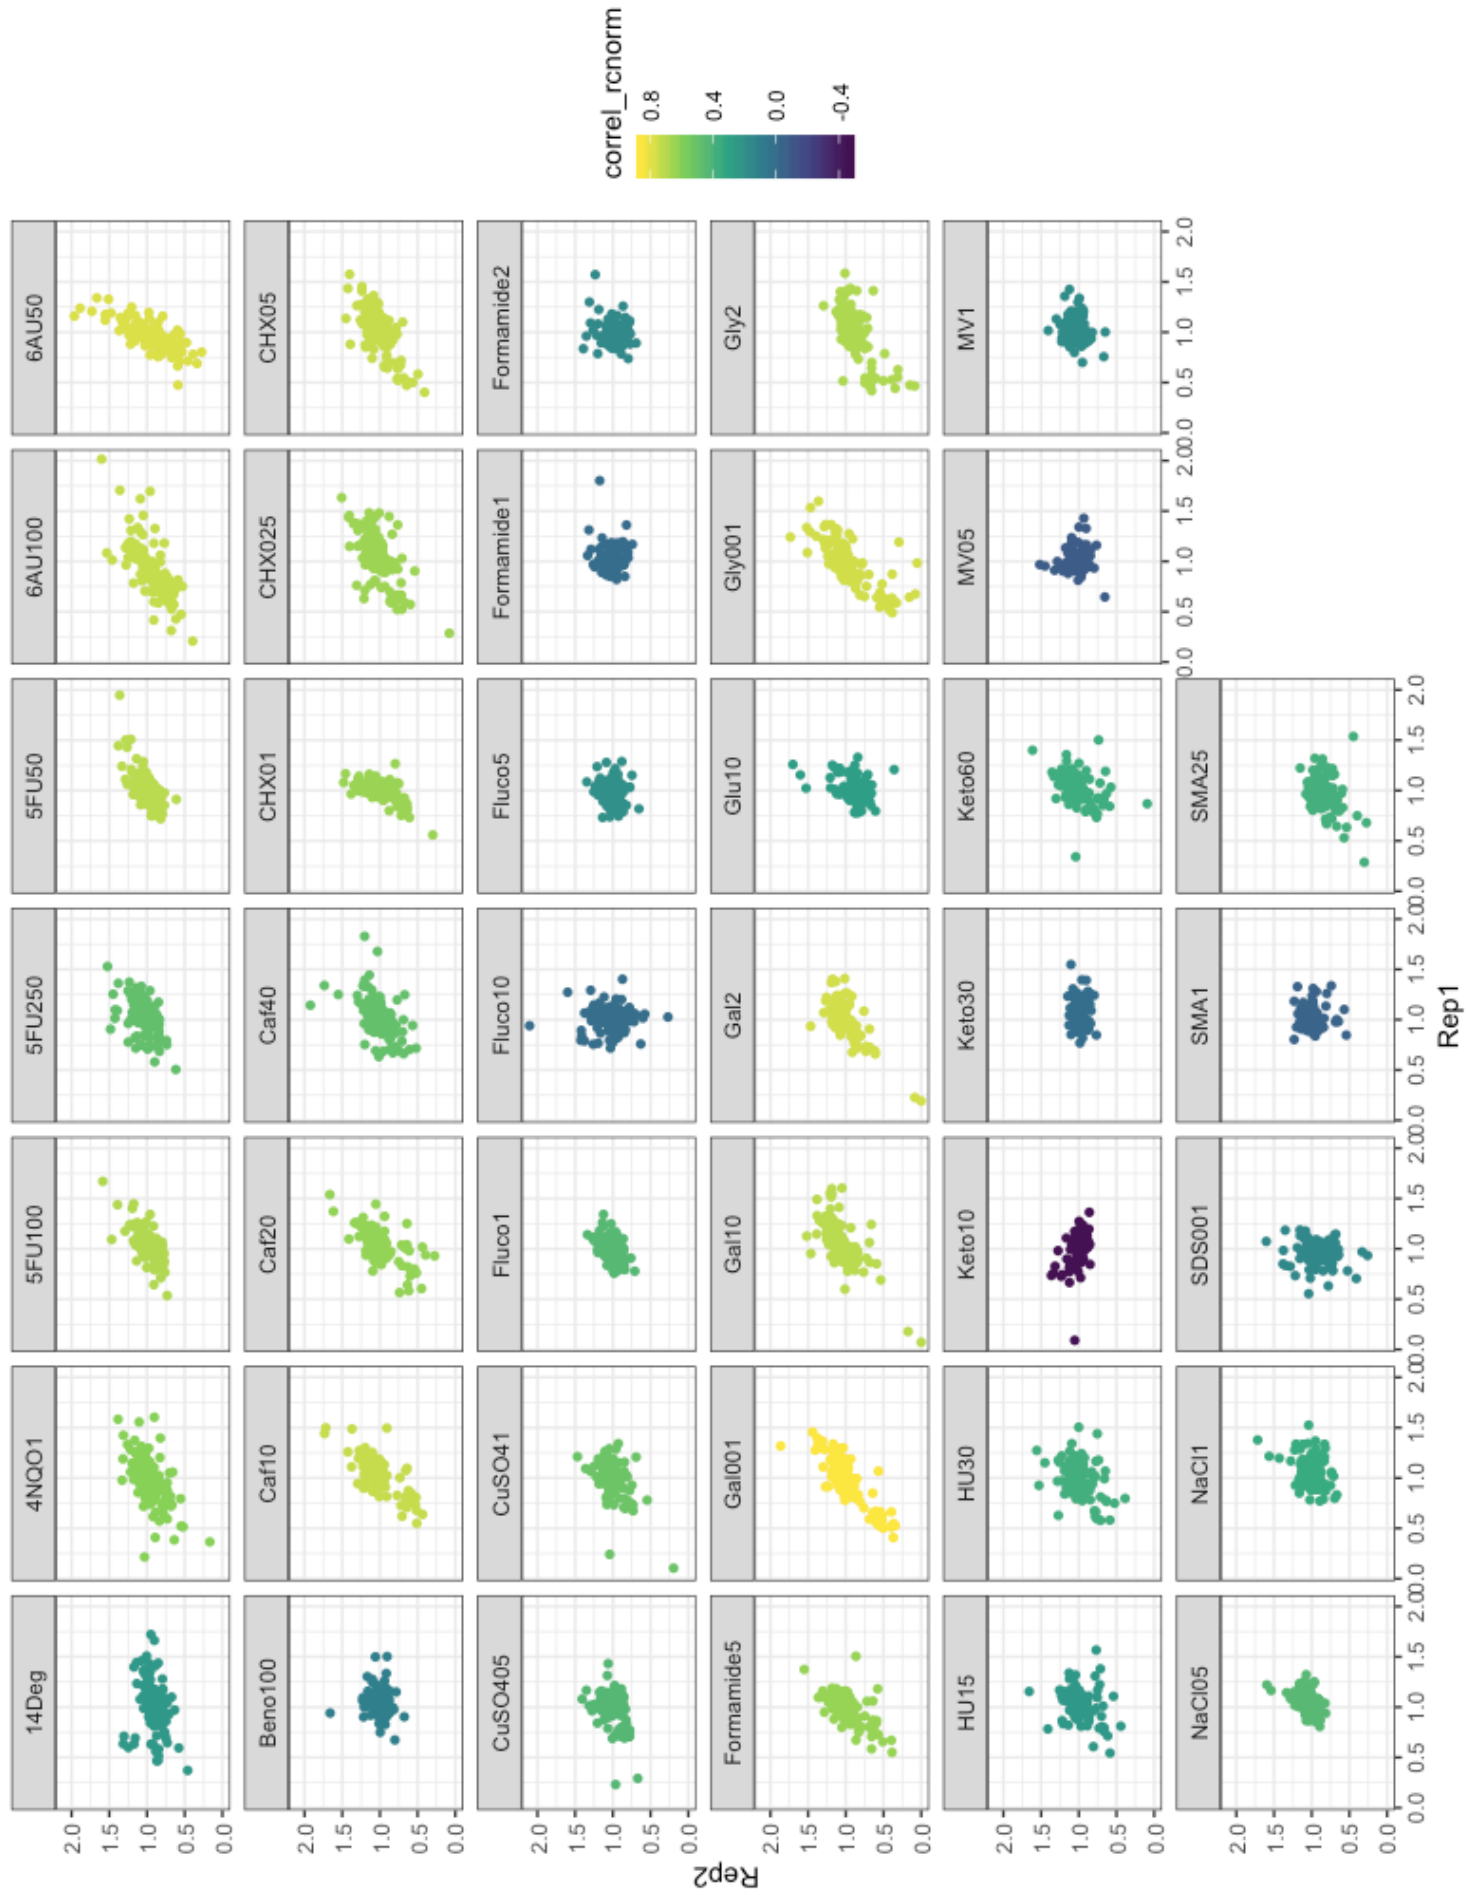

Supplementary figure 7
